# Supplementary material for: Mosquito (MS), a DD37E Family of Tc1/Mariner, Displaying a Distinct Evolution Profile from DD37E/TRT and DD37E/L18
Source: MDPI journal article supplement (doi:10.3390/genes14071379), 2023-06-29
Supplement: s1 [file s1]

DD37E-TRT-Dr : MGQ-----KKDLTGSESKVRYLAEG-----CSLTKAKLLKRD-----HRTIKRFFIQN--SQQGRKKRVEKPRR : 59  
DD37E-TRT-Mz : MGQ-----KKDLTGSESKVRYLAEG-----CSSLKAKLLKRD-----HRTIKRFFIQN--SQQGRKKRVEKPRR : 59  
DD37E-TRT-Hb : MGQ-----KKDLTGSESKVRYLAEG-----CSLTKAKLLKRD-----HRTIKRFFIQN--SQQGRKKRVEKPRR : 59  
DD37E-L18-Acdi : MSK-----VNNCGRTYNPGEAIGESLTFASITDRMLLDGGDPATGFFG-GRFKNIGDCFG---VSAPFVSKLWKTFCLQ---GDHMPQKRSSGNPS : 83  
DD37E-L18-Exdi : MI-----VTKKGRTFHRGKSLGFDVETAIIVDHMISKGGDVTXHFPGSLREVAEHFK---VSKTTVKKIWRQCSET--ADIDVQWKGGNPP : 82  
DD37E-L18-Piim : MKKSH---VNNKGRRYDWGKPLGEDLRLSLVQYLLEKGANSESRFIPRGEAAKAGERFN---VSNNTIKNIWTLYADS--GDVKHRQGARGRPK : 86  
DD37E-MS-Mali : M-----QSLNEEQRRLVQYKTEHPG-----QSNHAAKYFAEVGVTRSTVYAILNRYEEGGEESVLSAGSGGCHRT : 68  
DD37E-MS-Plmu : M-----ARQKSTQLTAIVNLYNSTLIG-----RNRFYQVYLTFKGV-ASKSTIHRIIARSKEH---NNVVAKPRPGRTVK : 66  
DD37E-MS-Drin : M-----EKQQDKIVHNFLENPD-----WSLSKGKTLK---IAKSTVCDVIKRFKET--HTNRAKHQTLKRG : 59  
DD37E-MS-Opno : M-----SSSKELEV-ERFGRFEMLNPE-----MSATKVKHFKLEGVPERTGYRIVARINSG--QGVARNPMSGGNMA : 66  
DD37E-MS-Adho : DMNKKYLDVSLSHSVVFT-MASSFYQQ-EIDQLNHTQKPN-----LSYRAAKLLK---YFQSTVCSVLKKFRER--LTLDKSGSGGKQG : 80

### Helix1

### Helix2

### Helix3

DD37E-TRT-Dr : KITAHELRK KRAAAKMPLATSLA FQSCNI-----TGVPKSTRCAILRDM---AKVRHAERRPLNKTHKLKRQDWAKKYLKTDFS-----K : 139  
DD37E-TRT-Mz : KITAHELRK KRAAAKMPLATSLA FQSCNI-----TGVPKSTRCAILRDM---AKVRHAERRPLNKTHKLKRQDWAKKYLKTDFS-----K : 139  
DD37E-TRT-Hb : KITAHELRK KRAAAKMPLATSLA FQSCNI-----TGVPKSTRCAILRDM---AKVRHAERRPLNKTHKLKRQDWAKKYLKTDFS-----K : 139  
DD37E-L18-Acdi : HLKPEDVQLVEFLKKKEPSATLASKETVENYCNLNGGTSLSAIGNTVNRNLPDGPFTRKLTREK-ATKFTPONLAYCGQFENFISALPPE--K : 175  
DD37E-L18-Exdi : HLQSHHLDFTLEGLKTIKPSMPYSKTHEAVNNHCPIPAGTSRSSLGKAVQCNRLGGRTWWRMSRAN-GDKFLPANTNYCQDFNINMNTIDPY--R : 174  
DD37E-L18-Piim : LLDDEDFNYIAAIIKKEPFEITLENKEKLLQ--NANKEVTMTISNALBKDLIGGQWTRVLTKTA-TERFTPANEQYTEAYIAEQSKRPPI--R : 176  
DD37E-MS-Mali : ELKVTNAEVKNIVKDAQGLSQREARKFEDI-----SQAYVGKILQEN---GLKAYKKEKVAVTDQQRERQQVRVGRLYRTILDGRGGDL : 152  
DD37E-MS-Plmu : KADAKNLEK-KKIVDGKDHVSDFFAAQRMGW-----SRSYIQKVRVQTL---GIHKYKRSAPFYTEEEHEAKKRCRKMVTEVFTPGTN-DL : 150  
DD37E-MS-Drin : CRNRYLRAKIRSLRANPELDGDRAKRLKT-----SASTIRRIRLSE---GIKAYVCVKNNRSDKQNLNAKTRARLLYDQVLTKFQG--C : 141  
DD37E-MS-Opno : -IDQIKDKDIEFAVNEVGLSYRQGRKFNI-----SYHSVESILTEA---GVQVRKKKCKSTEKQIEAQKKCLOKLRRTLFKASNG-VD : 148  
DD37E-MS-Adho : VKDKKKKARLQLFTENPKLSRD AKKVKM-----SQSYVQKVSRSG---GLKSYIAQAANRDAKQNSAKRRARKLYNDLITKFE--C : 161

### Helix1

### Helix2

### Helix3

DD37E-TRT-Dr : VLWTDDEMRVSDGPDGWARGWIGKGQR--APVRLR---RQQGGGGVILWAGTIKDELVGPFPRVEDGVKINSQSYCQFLEDTFFKQWYRKKSASE-- : 228  
DD37E-TRT-Mz : VLWTDDEMRVSDGPDGWARGWIGKGQR--APVRLR---RQQGGGGVILWAGTIKDELVGPFPRVEDGVKINSQSYCQFLEDTFFKQWYRKKSASE-- : 228  
DD37E-TRT-Hb : VLWTDDEMRVSDGPDGWARGWIGKGQR--APVRLR---RQQGGGGVILWAGTIKDELVGPFPRVEDGVKINSQSYCQFLEDTFFKQWYRKKSASE-- : 228  
DD37E-L18-Acdi : IKFFDEAGVN-SGT-----GNPVYGSLLKGTKSIEIAAIPRGVNTLNL-----VCEGILTA-----NTLDGASNSTFTTNF : 244  
DD37E-L18-Exdi : IKYFDEAGFCIPDV-----GKPTYGHSQINIKVEIGRYHNAPNTLNL-----ICIXGVVYA-----NTEDGSPDITLRLNFW : 244  
DD37E-L18-Piim : IKFMDDEAGFALSEA-----VNRTRGHAPKGIKRAIEAQKRMKTTNTLNL-----ICLDGTVES-----TFVDGSPNRDEFLEKI : 246  
DD37E-MS-Mali : IWLIDDESYFHSQOMIPGNSFYATARGDAPVEKRVSPQKFGDKILVWLAI SRHGASRVVMCHS-KTNKELIYA-----NECIRKRLVPDL : 238  
DD37E-MS-Plmu : IUVVDEHYVYIDQSNVSVMYINYSTSRNVAPKEIKTRPQRKFCPKLWVLAISVKGRSEPIYIAPHKQNDRKVYL-----KECLEKRLIPDL : 237  
DD37E-MS-Drin : IIMDDETYIKINFKQLAGRKFIYAYKRGCVASKRKNIPMDKFGKALINQAHCSGCLKSRAFVTT-SSMTSEVYV-----KCMQKRLIPFI : 227  
DD37E-MS-Opno : IUMDDDESYFTIDGSDTNYNDFYGHPSLEAPESVKYRPKKFPEKVMVMAMSPKGFSEKPIYVKSNGNAVTDVYV-----RESL-TELRDPL : 234  
DD37E-MS-Adho : IWLDDETYITKADFQIPGQEFYTSKSRDAPEDCKVKKRSKFPKKFLWQA--CSCGRKRSFITT-GTVNGEIMK-----KECLOKRLIPDL : 247

### D

DD37E-TRT-Dr : -----KKNMIFMQDNPPSHASKY---STAILARKGTHKEEKLMTWPPCSPDINPIENLWSIIKCEITYKEGKQYTSLNSVWEAIVAA : 305  
DD37E-TRT-Mz : -----KKNMIFMQDNPPSHASKY---STAILARKGTHKEEKLMTWPPCSPDINPIENLWSIIKCEITYKEGKQYTSLNSVWEAIVAA : 305  
DD37E-TRT-Hb : -----KKNMIFMQDNPPSHASKY---STAILARKGTHKEEKLMTWPPCSPDINPIENLWSIIKCEITYKEGKQYTSLNSVWEAIVAA : 305  
DD37E-L18-Acdi : GEAGQATSALGNPAIEQGDFIIMDNCAIHRFEAGTALQITLMDMGANVT---YTPSLSEEFNAVELVENKLIKILKREEYVPLLKENVHVAVYES : 336  
DD37E-L18-Exdi : GEASNSRIPSGFPALQYGDIVVLDCATHHNNGGFILAPLDQFCIDVY---YIPVYSEINPCBLAFNKFKLAQRSDIKAVFNRRNVHDGYEC : 336  
DD37E-L18-Piim : DEAAATSFSDDGSPVLQPGDVLVVDNNTIHRFEAERILRIFNNIIGVEYI---FIPKYSFDVNPVEFSFNITRTMKSEIFISALANDNLQYALKV : 338  
DD37E-MS-Mali : NEQHS-----DGNYLFWPDLASCHYAKD---VIEVFQQLDINFSKEQNEPCVPHLRPIEHFWGILKQOYVHHWSQAQTLQOLKNRKKK : 320  
DD37E-MS-Plmu : KTAYP-----KGNALFWPDLKRAHNART---VQFELREQKIKCVEYNLNEPKFQARPIETYMAKIDRRISLYREPTKDLQILKRRIRET : 319  
DD37E-MS-Drin : HMHRS-----PVKFWPDLATCHYSNT---TKLIEYANQVDVLPKWLNFPNCPETPRPIERYAIVGKKIKRSGSIVNEKSMLIAFNKY : 307  
DD37E-MS-Opno : DEYHS-----DENYLFWPDLASCHYART---TQEIYANVGKVVPKELNFPNVPOLREPIETFWAYLGRKIYANGWATAKNWKQKRRKEFI : 316  
DD37E-MS-Adho : RNHSS-----QSLFWPDLASCHYSKA---VMEIYDQNSAVVVPQCNPPNCELRPIEYYSIMKGIKKKGKGGHPKSAAELOKMWTTWA : 327

### D

### E

DD37E-TRT-Dr : ARNVDGEQKRTLTESDGRLLSVLAKKGG-----YIGH : 338  
DD37E-TRT-Mz : ARNVDGEQKRTLTESDGRLLSVLAKKGG-----YIGR : 338  
DD37E-TRT-Hb : ARNVDGEQKRTLTESDGRLLSVLAKKGG-----YIGR : 338  
DD37E-L18-Acdi : LDQDIDTNDYGFYSLL----- : 353  
DD37E-L18-Exdi : LQHTLSLDCAGFYREVG-----YLSM : 357  
DD37E-L18-Piim : LDTISQDDIAGFVSKVG-----YIEA : 359  
DD37E-MS-Mali : LREVDWSVHHMMGQVKSQIR-ARADGF----- : 348  
DD37E-MS-Plmu : IKRPESYLSVMEGVRTKLRE-IADWGP----- : 347  
DD37E-MS-Drin : AAKVDRKCYQLKMSNKKNTNRHFIRCKQN----- : 336  
DD37E-MS-Opno : IRNIPENLCQNLKMNKTNVRK-AADRGVLSVIKPNQIVSH : 356  
DD37E-MS-Adho : CKKYPDSAQTILMSRRKKVRSMAYSKDN----- : 356
