# Supplementary figures and images for: Mosquito (MS), a DD37E Family of Tc1/Mariner, Displaying a Distinct Evolution Profile from DD37E/TRT and DD37E/L18
Source: MDPI journal article supplement (doi:10.3390/genes14071379), 2023-06-29

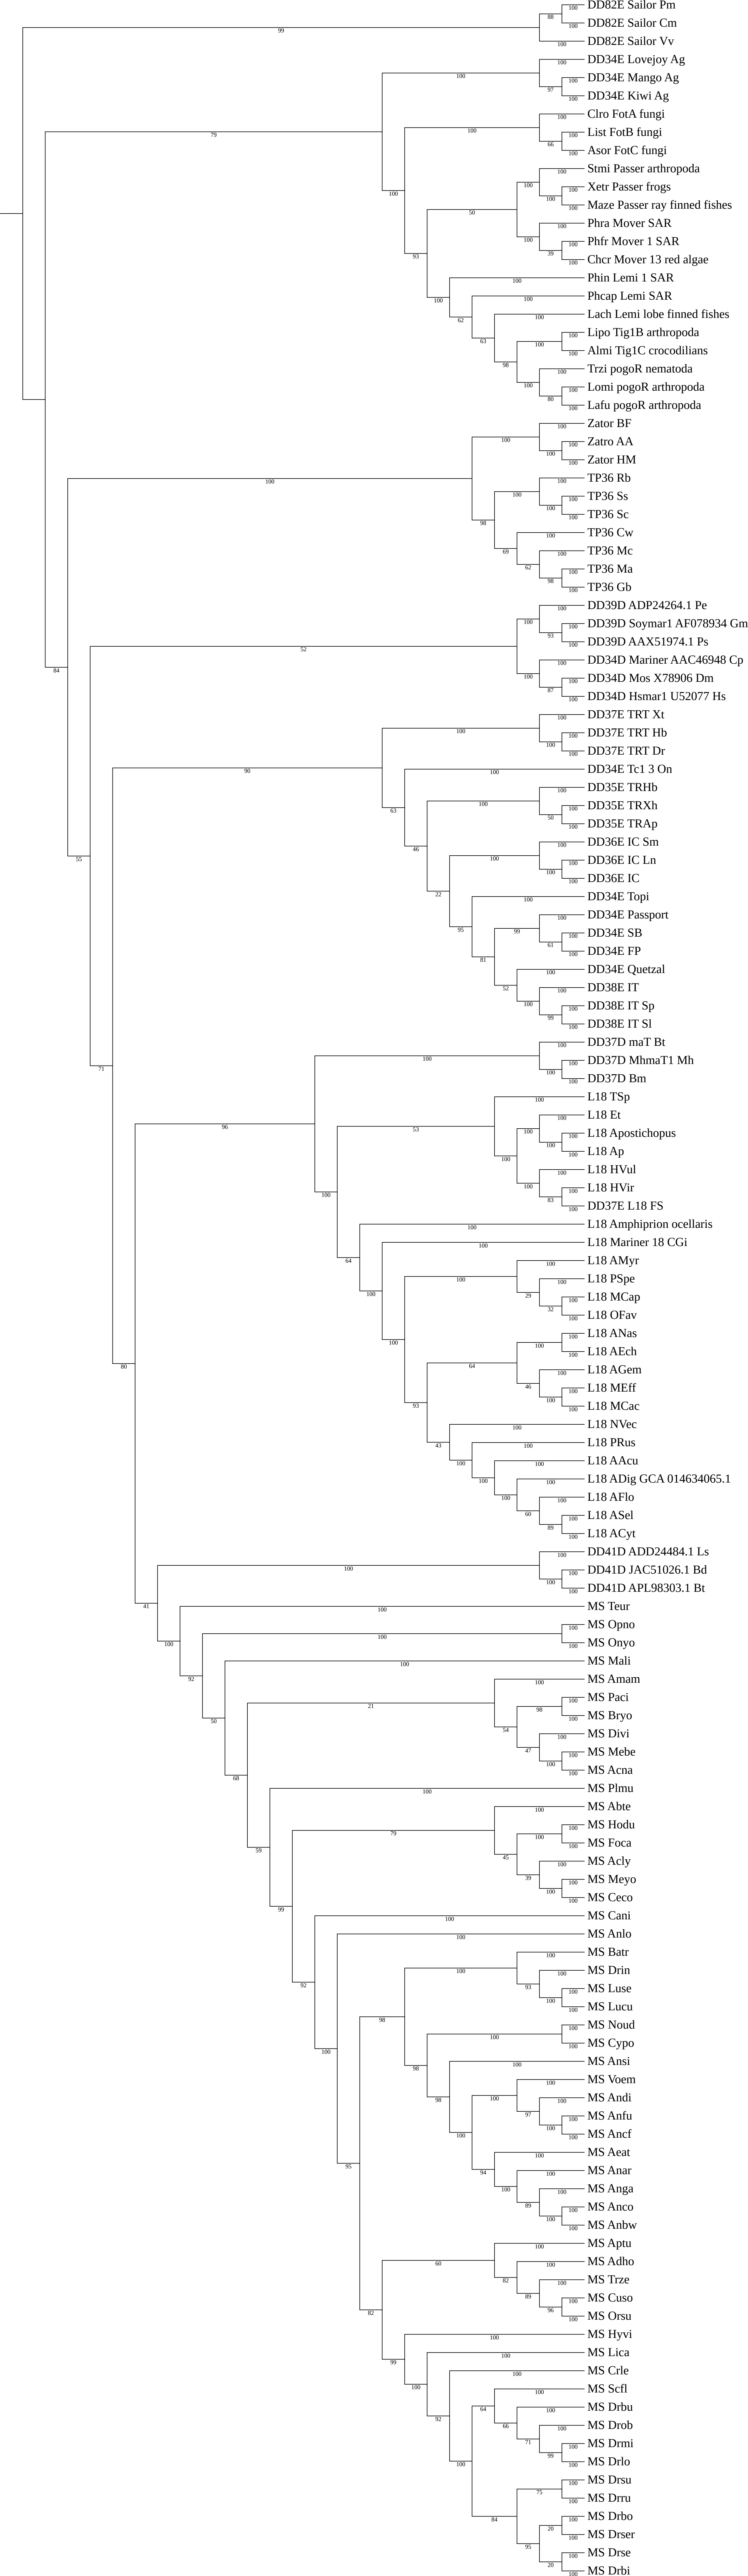

Supplement: s1 [file s1]

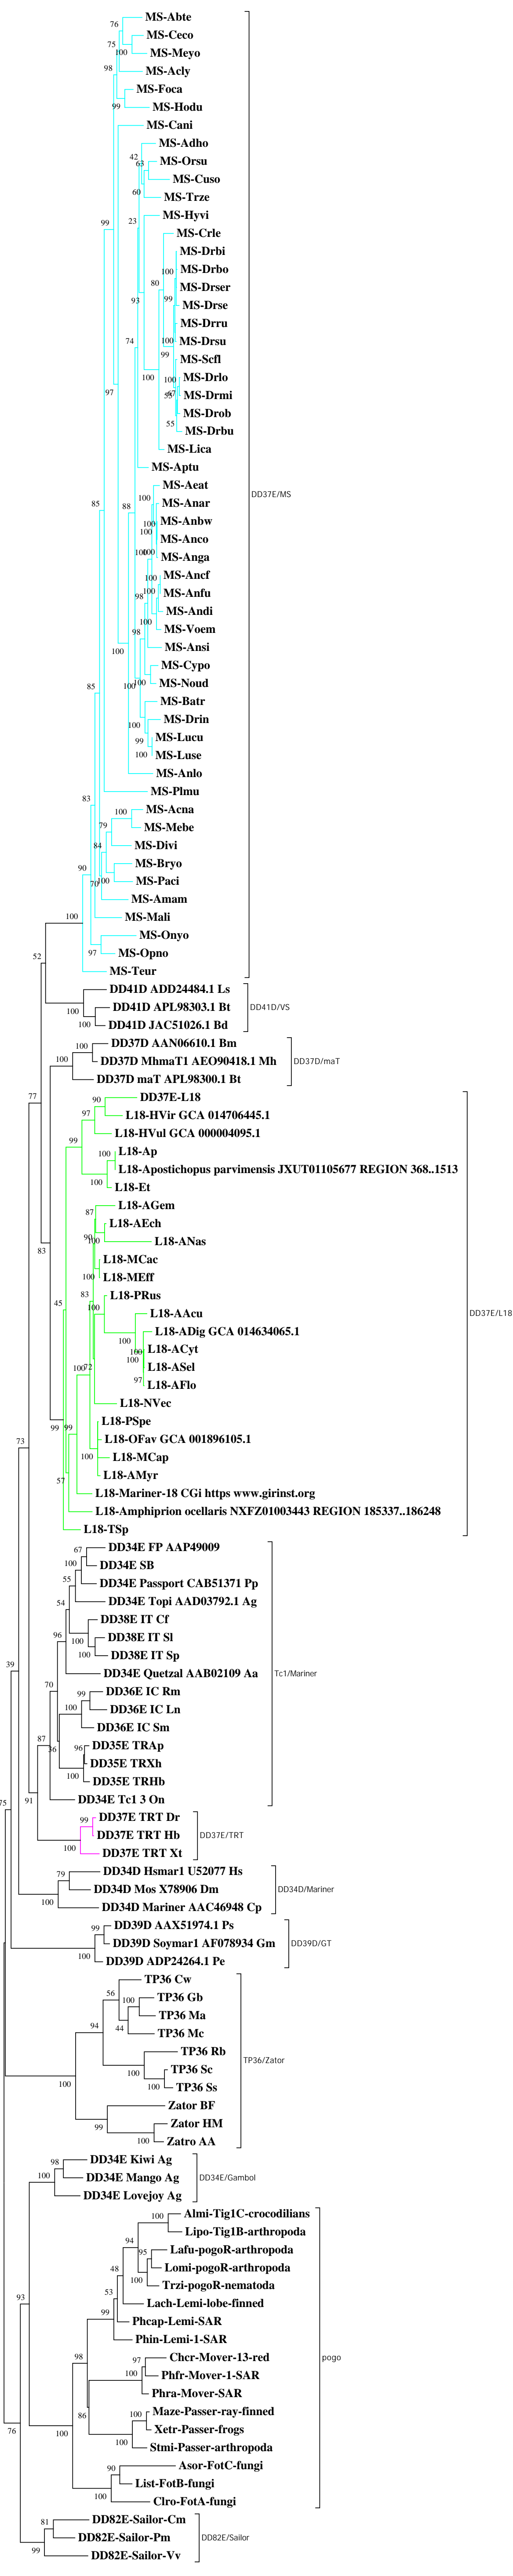

Supplement: s1 [file s1]
